# Supplementary material for: Semantic intrusion errors differentiate between amnestic MCI who are plasma p-tau217+ from p-tau217- after adjusting for initial learning strength
Source: Frontiers journal article supplement (doi:10.3389/fneur.2025.1613694), 2025-07-22
Supplement: Table_1.docx [file Table_1.docx]

Supplementary Material

# Supplementary Figures and Tables

**Table 1: Diagnostic Groups Demographic, LASSI-L Indices and Plasma Biomarkers**

|  | aMCI  p-tau217- (n=50) | aMCI  p-tau217+  (n=58) | F-or X2  Value | p-value | Cohen’s d |
| --- | --- | --- | --- | --- | --- |
| Age  (range 56-93) | 70.80  (SD= 7.8) | 73.59  (SD=7.3) | 4.10 | .045 | .689 |
| Education  (range 6-22) | 15.33  (SD=3.6) | 15.80  (SD=3.1) | .452 | .503 | NA |
| MMSE Score  (range 23-30) | 28.18  (SD=1.7) | 27.00  (SD=2.2) | 6.98 | .009 | .303 |
| % Female | 59.2 % | 47.5% | 1.044 | .317 | NA |
| % Hispanic/Latino | 59.2 % | 50.8 % | .452 | .501 | NA |
| % *ApoE* ɛ4 positive | 32.0% | 54.2% | 4.57 | .033 | NA |
| % Aβ PET positive | 13.0% | 87.0% | 44.01 | <.001 | NA |
| p-tau217  (range=.180- 3.15) | .344  (SD=.103) | 1.167  (SD=.570) | 121.042 | <.001 | 2.446 |
| LASSI-L Cued A2 Recall  (range 6-15) | 12.26  (SD=2.2) | 10.97  (SD=2.4) | 8.71 | .004 | .561 |
| LASSI-L Cued B1 Recall  (range 6-15) | 5.52  (SD=2.7) | 5.74  (SD=2.4) | .211 | .647 | N/A |
| LASSI-L Cued B1 Intrusions  (range 0-13) | 3.28  (SD=3.0) | 5.47  (SD=3.5) | 11.92 | <.001 | .674 |
| LASSI-L Cued B2 Recall  (range 3-15) | 9.90  (SD=2.5) | 8.33  (SD=2.4) | 11.11 | .001 | .641 |
| LASSI Cued B2 Intrusions  (range 0-13) | 2.34  (SD=2.0) | 4.36  (SD=2.9) | 17.10 | <.001 | .824 |

**Table 2: Plasma p-tau217****Biomarker Status and LASSI-L Performance After Adjustment for Age, MMSE and Maximum Learning Capacity on Cued A2**

|  | aMCI  p-tau217- (n=50) | aMCI  p-tau217+  (n=58) | F-Value | p-value |
| --- | --- | --- | --- | --- |
| LASSI-L Cued B1 | 5.18  (SE=.34) | 6.04  (SE=.31) | 3.31 | .072 |
| LASSI-L Cued B1 Intrusions | 3.73  (SE=45) | 5,08  (SE=.42) | 4.56 | .035 |
| LASSI-L Cued B2 | 9.38  (SE=2.9) | 8.78  (SE=2.6) | 2.28 | .134 |
| LASSI-L Cued B2 Intrusions | 2.69  (SE=.35) | 4.06  (SE=.32) | 7.87 | .006 |

Note: These are mean values adjusted for covariates with their standard

errors of measurement. After statistical adjustment, only SIES were statistically significant.

**Table 3: Biological Predictors of LASSI-L Cued B2 Intrusions for Entire Sample (Simultaneous Entry)**

|  | B | SE | Standardized Beta | t-value | Significance | Lower  Bound 95% Confidence Interval | Upper  Bound 95% Confidence Interval |
| --- | --- | --- | --- | --- | --- | --- | --- |
| ApoE 4 Allele | 1.75 | .50 | .32 | 3.52 | p<.001 | .76 | 2.7 |
| Age | .07 | .03 | .19 | 2.16 | .033 | .01 | .13 |
| p-tau217 | 1.15 | .44 | .24 | .2.61 | .01 | .28 | 2.02 |

Note: Each variable is adjusted for every other statistical variable in the model.

**Table 4: Biological Predictors of LASSI-L Cued B2 Intrusions for Entire Sample (Stepwise Entry)**

| Model | R | R Square | Adjusted  R Square | Std. Error of the Estimate | R Square Change | F Change | df1 | df2 | Sig F. Change |
| --- | --- | --- | --- | --- | --- | --- | --- | --- | --- |
| 1 | .366a | .134 | .126 | 2.541 | .134 | 16.371 | 1 | 106 | <.001 |
| 2 | .453b | .206 | .190 | 2.445 | .072 | 9.485 | 1 | 105 | .003 |
| 3 | .489c | .240 | .218 | 2.404 | .034 | 4.645 | 1 | 104 | .033 |

1. Predictors: (Constant), APOƐ Genotype
2. Predictors: (Constant), APOƐ Genotype, p-tau217
3. Predictors: (Constant), APOƐ Genotype, p-tau217, Age

Note that R squared and eta square represent effect sizes
